# Supplementary material for: Influence of Radiation Sterilization on Properties of Biodegradable Lactide/Glycolide/Trimethylene Carbonate and Lactide/Glycolide/ε-caprolactone Porous Scaffolds with Shape Memory Behavior
Source: MDPI journal article supplement (doi:10.3390/ma9010064), 2016-01-20
Supplement: s1 [file s1]

# Supplementary Materials: Influence of Radiation Sterilization on Properties of Biodegradable Lactide/Glycolide/Trimethylene Carbonate and Lactide/Glycolide/ $\epsilon$ -Caprolactone Porous Scaffolds with Shape Memory Behaviour

Piotr Rychter, Natalia Śmigiel-Gac, Elżbieta Pamuła, Anna Smola-Dmochowska, Henryk Janeczek, Wojciech Prochwicz and Piotr Dobrzyński

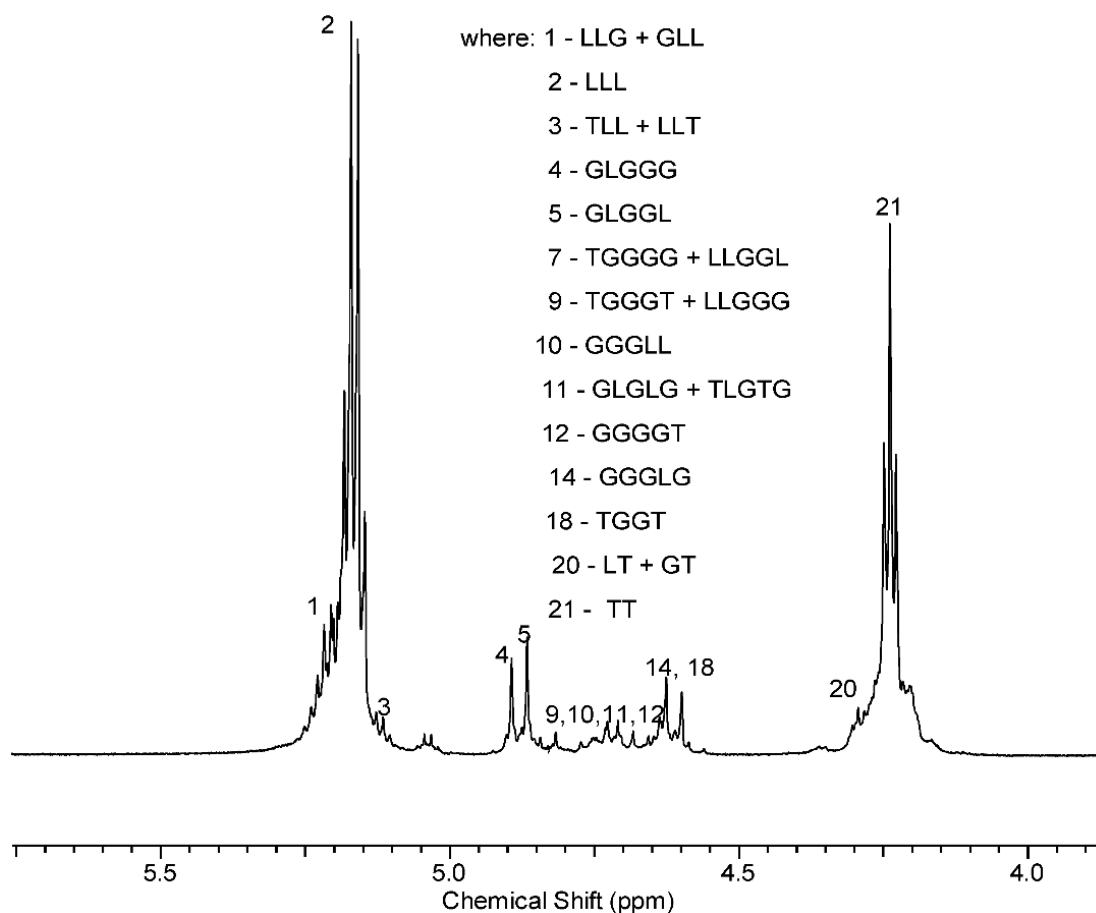

Figure S1.  $^1\text{H}$  NMR spectrum of terpolymer LGT21 (in  $\text{CDCl}_3$ ).

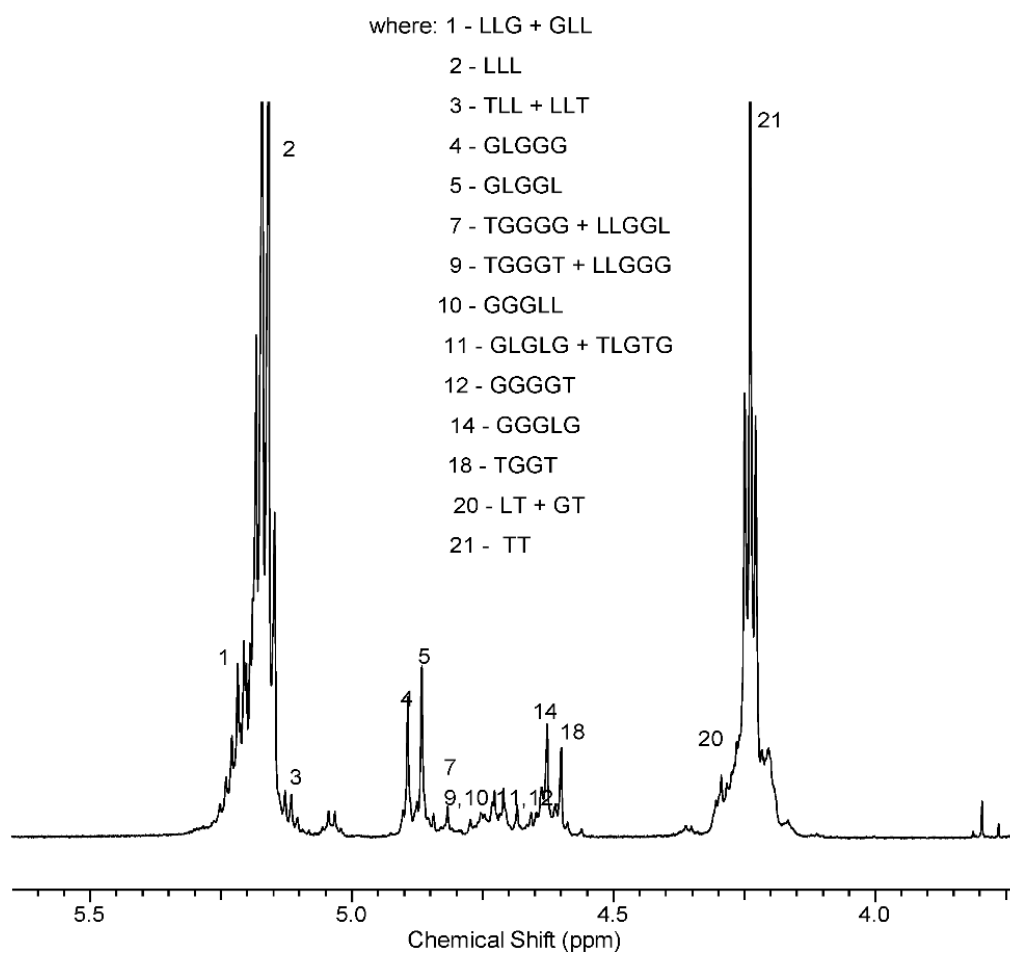

**Figure S2.**  $^1\text{H}$  NMR spectrum of terpolymer LGT40 (in  $\text{CDCl}_3$ ).

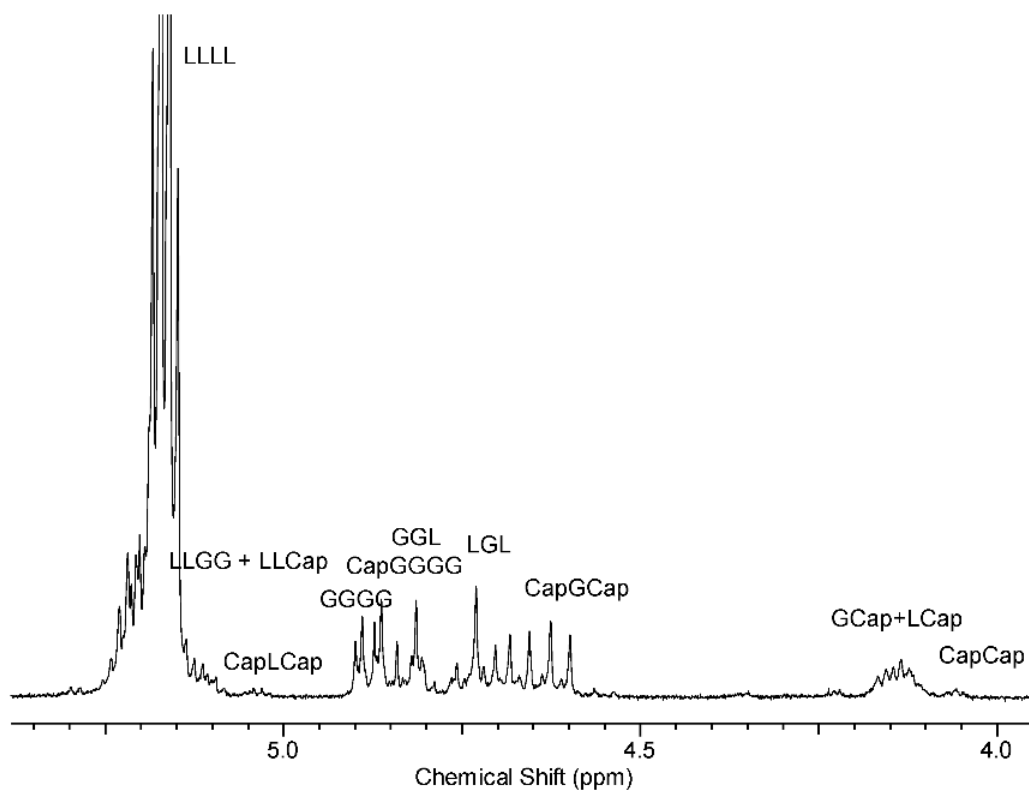

**Figure S3.**  $^1\text{H}$  NMR spectrum of terpolymer LGC (in  $\text{CDCl}_3$ ).

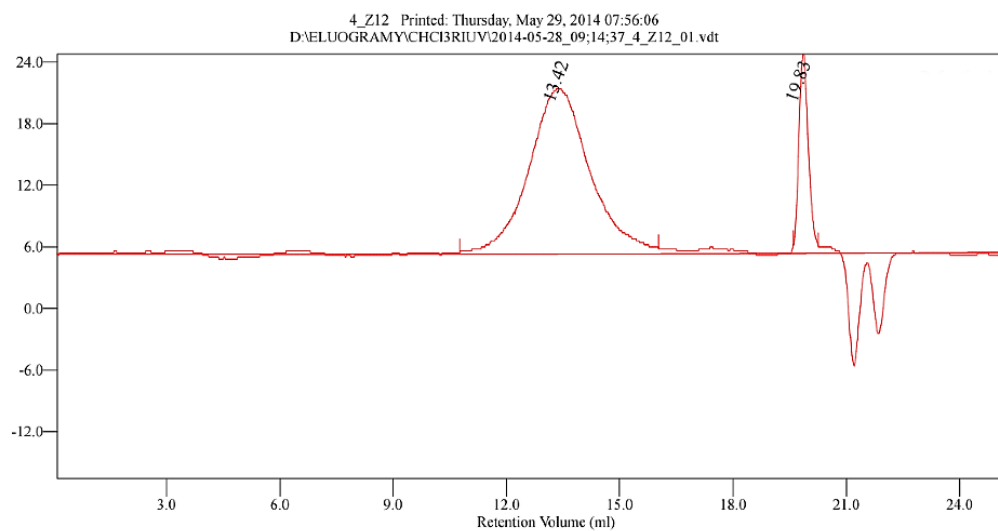**A)**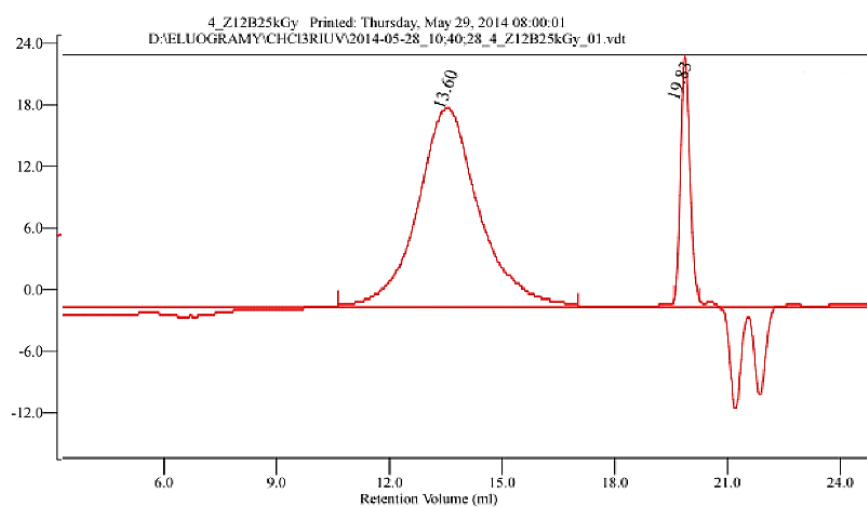**B)**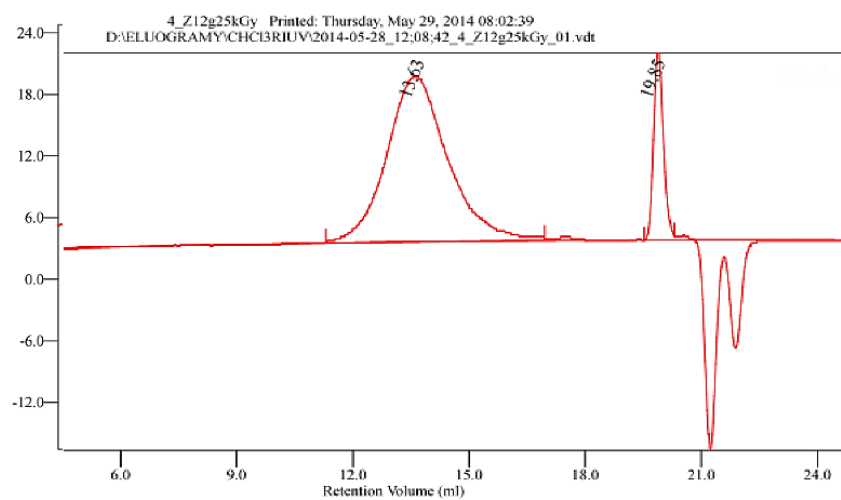**C)**

**Figure S4.** GPC chromatograms for sample LGT21; **(A)** before irradiation; **(B)** after electron beam irradiation with 25 kGy dose; and **(C)** after  $\gamma$  irradiation with 25 kGy dose.

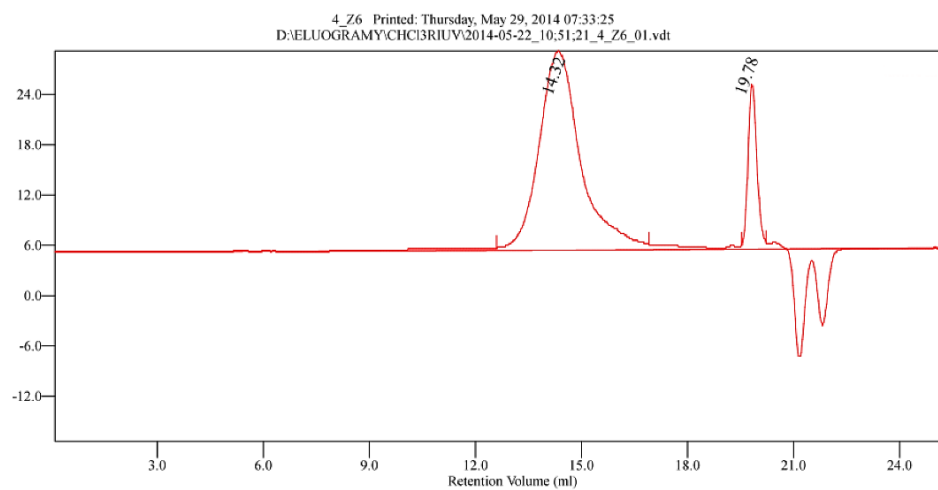**A)**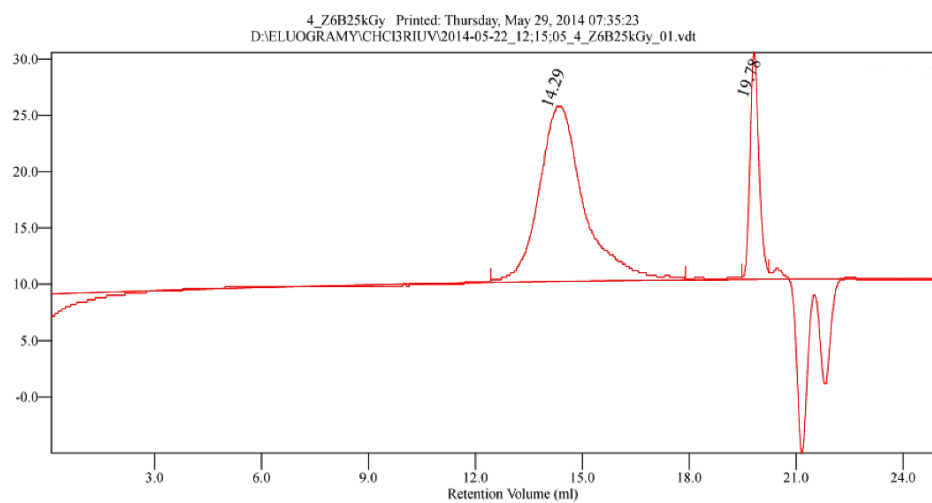**B)**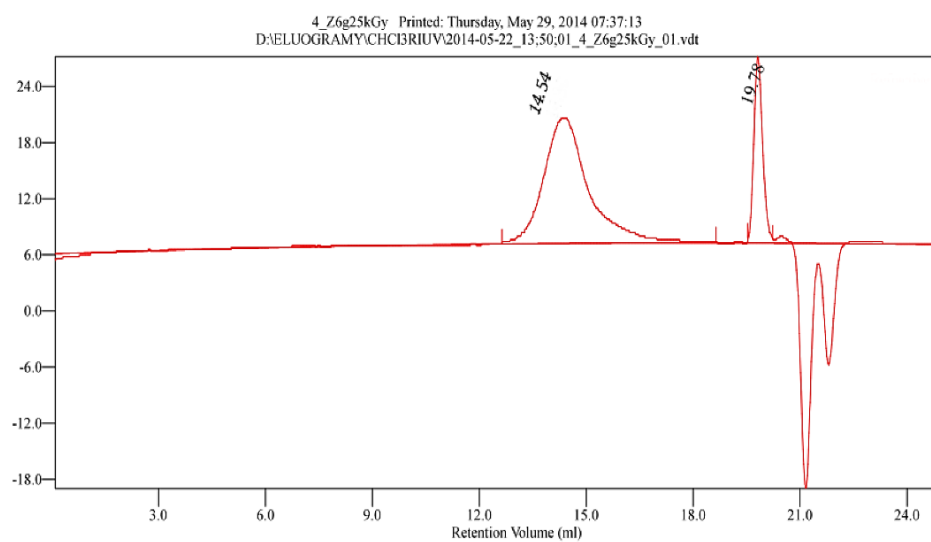**C)**

**Figure S5.** GPC chromatogram for sample LGT40; **(A)** before irradiation; **(B)** after electron beam irradiation with 25 kGy dose; and **(C)** after  $\gamma$  irradiation with 25 kGy dose.

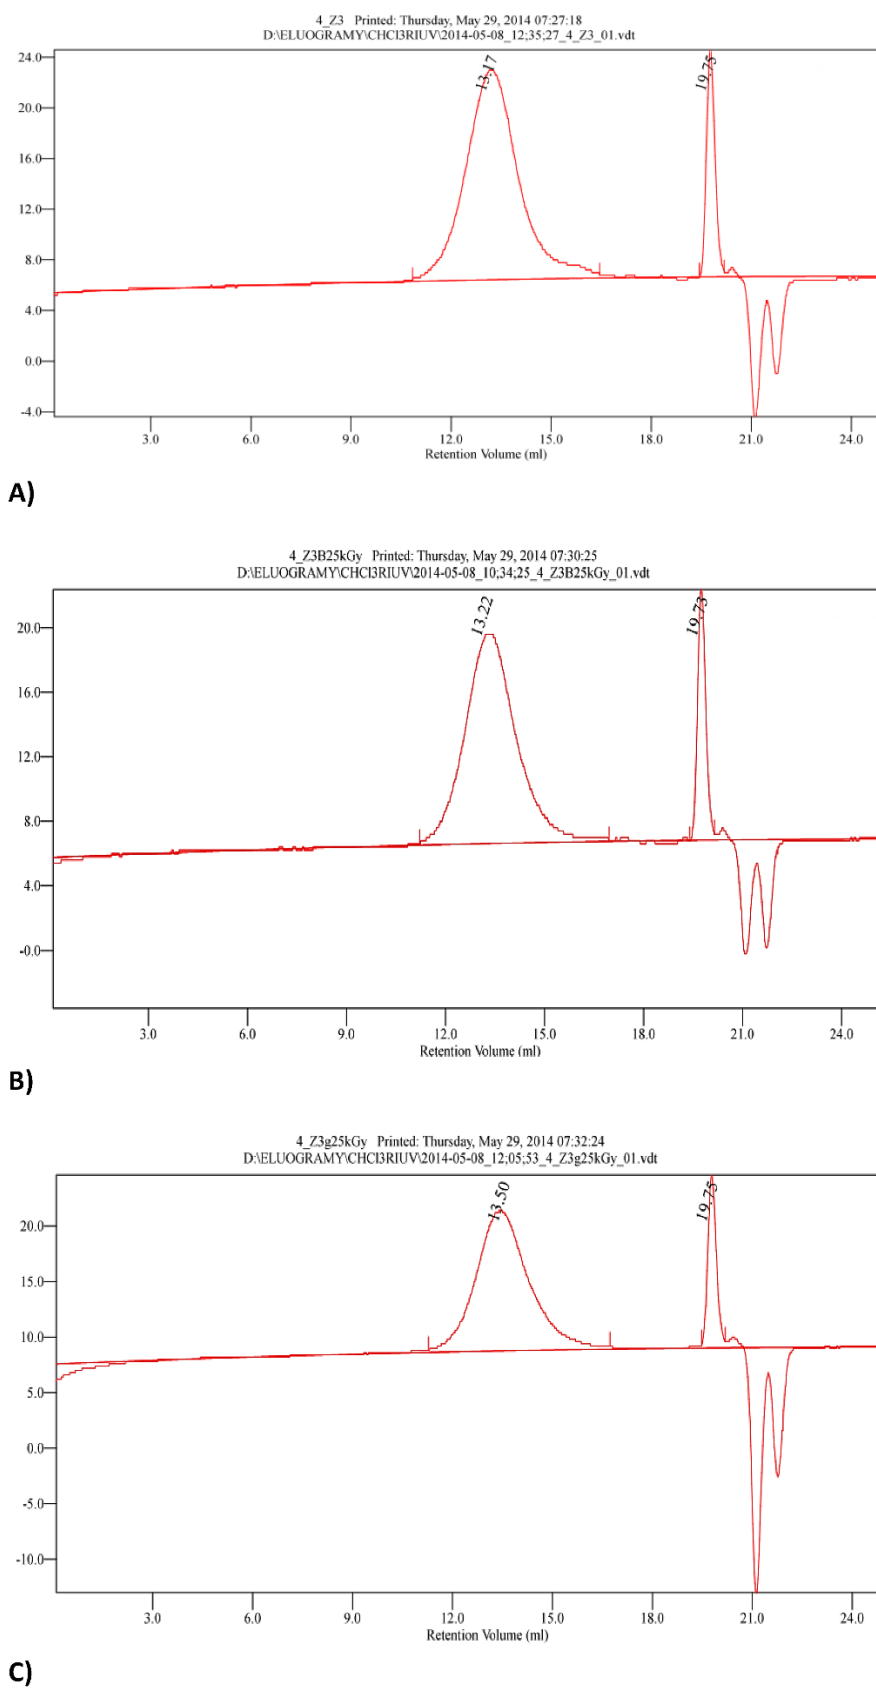

**Figure S6.** GPC chromatograms for sample LGC; **(A)** before irradiation; **(B)** after electron beam irradiation with 25 kGy dose; and **(C)** after  $\gamma$  irradiation with 25 kGy dose.

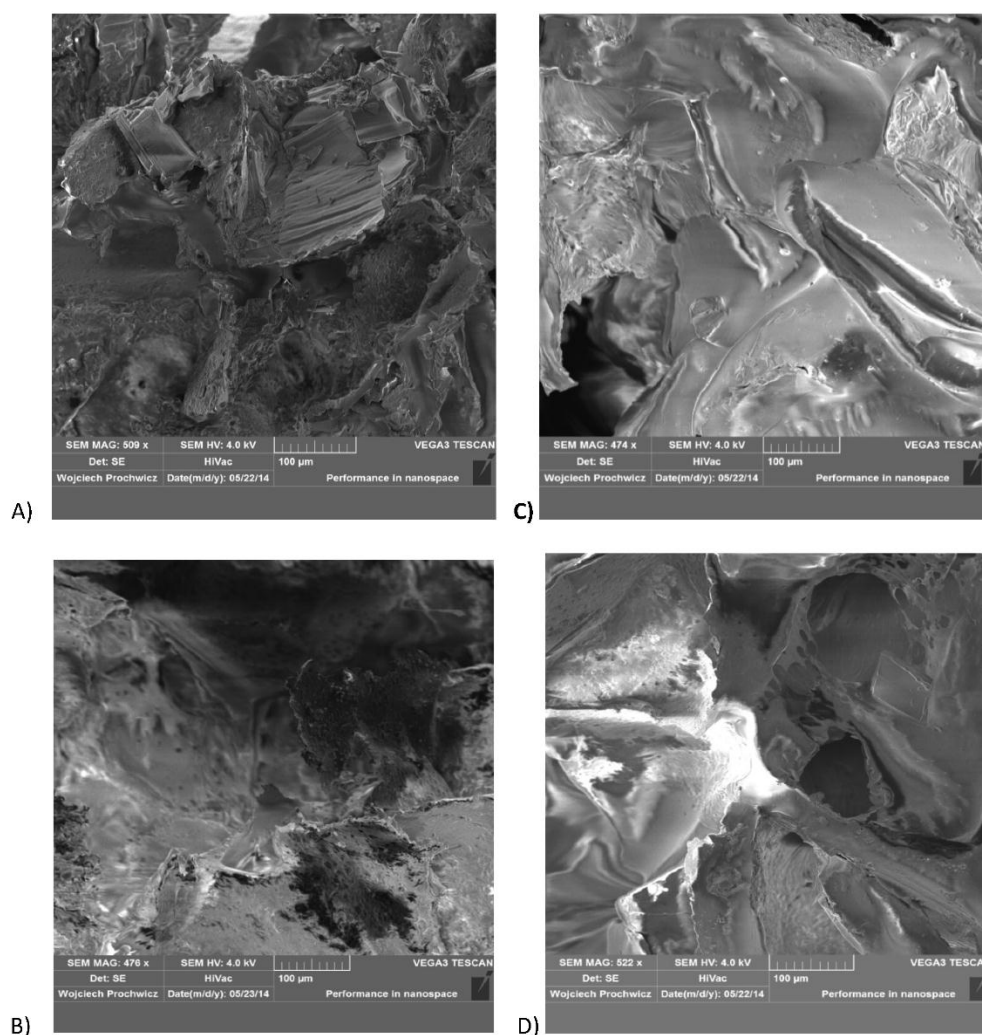

**Figure S7.** SEM pictures of porous surface of scaffolds; **(A)** LGT40 C scaffold after  $\gamma$  sterilization with irradiation dose 25 kGy, in compressed temporary shape; **(B)** LGT40 C scaffold after  $\gamma$  sterilization with irradiation dose 25 kGy, after recovery to permanent shape; **(C)** LGC C scaffold after electron beam sterilization with dose 25 kGy, in compressed temporary shape; and **(D)** LGC C scaffold after electron beam sterilization with dose 25 kGy, after recovery to permanent shape.
